# Supplementary material for: An ultra high-throughput method for single-cell joint analysis of open chromatin and transcriptome
Source: Springer Nature journal article supplement (doi:10.1038/s41594-019-0323-x), 2019-11-01
Supplement: MOESM2 [file 41594_2019_323_MOESM2_ESM.xlsx]

## Sheet: Sheet1
Supplementary Table 1. Paired-seq Primer Sequences
Name	Sequence (5'-3')
pMENTs	5Phos/CTGTCTCTTATACACATCTddC
AdaptorA	TCGTCGGCAGCGTCAGATGTGTATAAGAGACAG
Linker-R02	CGAATGCTCTGGCCTCTCAAGCACGTGGAT
Linker-R03	GGTCTGAGTTCGCACACGCTCCTCGAATCC
Linker-R04	AGTCGTACGCCGATGCGAAACATCGGCCAC
Blocker-R02	ATCCACGTGCTTGAGAGGCCAGAGCATTCG
Blocker-R03	GGATTCGAGGAGCGTGTGCGAACTCAGACC
Terminator	GTGGCCGATGTTTCGCATCGGCGTACGACT
Anchor	AAGCAGTGGTATCAACGCAGAGTGAATGGGGGGGGGH
PA-F	CAGACGTGTGCTCTTCCGATCT
PA-R	AAGCAGTGGTATCAACGCAGAGT
N5XX	AATGATACGGCGACCACCGAGATCTACACNNNNNNNNTCGTCGGCAGCGTC
P7XX	CAAGCAGAAGACGGCATACGAGATNNNNNNGTGACTGGAGTTCAGACGTGTGCTCTTCCGATC
