# Supplementary material for: An ultra high-throughput method for single-cell joint analysis of open chromatin and transcriptome
Source: Springer Nature journal article supplement (doi:10.1038/s41594-019-0323-x), 2019-11-01
Supplement: MOESM3 [file 41594_2019_323_MOESM3_ESM.xlsx]

## Sheet: Sheet1
Supplementary Table 2. Paired-seq Barcode Oligos Sequences
BC#01 WellPosition	Name	Sequence
A1	DNA_#01_RE	/5Phos/AGGCCAGAGCATTCGAGATCGCGGCCGCAGATGTGTATAAGAGACAG
A2	DNA_#02_RE	/5Phos/AGGCCAGAGCATTCGAGTGAGCGGCCGCAGATGTGTATAAGAGACAG
A3	DNA_#03_RE	/5Phos/AGGCCAGAGCATTCGAGGCTGCGGCCGCAGATGTGTATAAGAGACAG
A4	DNA_#04_RE	/5Phos/AGGCCAGAGCATTCGAGCAGGCGGCCGCAGATGTGTATAAGAGACAG
A5	DNA_#05_RE	/5Phos/AGGCCAGAGCATTCGAGAGAGCGGCCGCAGATGTGTATAAGAGACAG
A6	DNA_#06_RE	/5Phos/AGGCCAGAGCATTCGAGTCTGCGGCCGCAGATGTGTATAAGAGACAG
A7	DNA_#07_RE	/5Phos/AGGCCAGAGCATTCGAGGAGGCGGCCGCAGATGTGTATAAGAGACAG
A8	DNA_#08_RE	/5Phos/AGGCCAGAGCATTCGAGCTCGCGGCCGCAGATGTGTATAAGAGACAG
B1	RNA_#01_RE	/5Phos/AGGCCAGAGCATTCGTCATCCCTGCAGGTTTTTTTTTTTTTTTTVN
B2	RNA_#02_RE	/5Phos/AGGCCAGAGCATTCGTCTGACCTGCAGGTTTTTTTTTTTTTTTTVN
B3	RNA_#03_RE	/5Phos/AGGCCAGAGCATTCGTCGCTCCTGCAGGTTTTTTTTTTTTTTTTVN
B4	RNA_#04_RE	/5Phos/AGGCCAGAGCATTCGTCCAGCCTGCAGGTTTTTTTTTTTTTTTTVN
B5	RNA_#05_RE	/5Phos/AGGCCAGAGCATTCGTCAGACCTGCAGGTTTTTTTTTTTTTTTTVN
B6	RNA_#06_RE	/5Phos/AGGCCAGAGCATTCGTCTCTCCTGCAGGTTTTTTTTTTTTTTTTVN
B7	RNA_#07_RE	/5Phos/AGGCCAGAGCATTCGTCGAGCCTGCAGGTTTTTTTTTTTTTTTTVN
B8	RNA_#08_RE	/5Phos/AGGCCAGAGCATTCGTCCTCCCTGCAGGTTTTTTTTTTTTTTTTVN
BC#02 WellPosition	Name	Sequence
A1	R02_#01	/5Phos/GTGCGAACTCAGACCAAACCGGATCCACGTGCTTGAG
A2	R02_#02	/5Phos/GTGCGAACTCAGACCAAACGTCATCCACGTGCTTGAG
A3	R02_#03	/5Phos/GTGCGAACTCAGACCAAAGATGATCCACGTGCTTGAG
A4	R02_#04	/5Phos/GTGCGAACTCAGACCAAATCCAATCCACGTGCTTGAG
A5	R02_#05	/5Phos/GTGCGAACTCAGACCAAATGAGATCCACGTGCTTGAG
A6	R02_#06	/5Phos/GTGCGAACTCAGACCAACACTGATCCACGTGCTTGAG
A7	R02_#07	/5Phos/GTGCGAACTCAGACCAACGTTTATCCACGTGCTTGAG
A8	R02_#08	/5Phos/GTGCGAACTCAGACCAAGAAGCATCCACGTGCTTGAG
A9	R02_#09	/5Phos/GTGCGAACTCAGACCAAGCCCTATCCACGTGCTTGAG
A10	R02_#10	/5Phos/GTGCGAACTCAGACCAAGCTACATCCACGTGCTTGAG
A11	R02_#11	/5Phos/GTGCGAACTCAGACCAATCTTGATCCACGTGCTTGAG
A12	R02_#12	/5Phos/GTGCGAACTCAGACCACAACACATCCACGTGCTTGAG
B1	R02_#13	/5Phos/GTGCGAACTCAGACCACAGTATATCCACGTGCTTGAG
B2	R02_#14	/5Phos/GTGCGAACTCAGACCACCAAGTATCCACGTGCTTGAG
B3	R02_#15	/5Phos/GTGCGAACTCAGACCACCCTAAATCCACGTGCTTGAG
B4	R02_#16	/5Phos/GTGCGAACTCAGACCACCCTTTATCCACGTGCTTGAG
B5	R02_#17	/5Phos/GTGCGAACTCAGACCACCTCTCATCCACGTGCTTGAG
B6	R02_#18	/5Phos/GTGCGAACTCAGACCACGATTGATCCACGTGCTTGAG
B7	R02_#19	/5Phos/GTGCGAACTCAGACCACGCAGAATCCACGTGCTTGAG
B8	R02_#20	/5Phos/GTGCGAACTCAGACCACGTAAAATCCACGTGCTTGAG
B9	R02_#21	/5Phos/GTGCGAACTCAGACCACTACCTATCCACGTGCTTGAG
B10	R02_#22	/5Phos/GTGCGAACTCAGACCACTCGGTATCCACGTGCTTGAG
B11	R02_#23	/5Phos/GTGCGAACTCAGACCACTGTCGATCCACGTGCTTGAG
B12	R02_#24	/5Phos/GTGCGAACTCAGACCACTTATGATCCACGTGCTTGAG
C1	R02_#25	/5Phos/GTGCGAACTCAGACCAGAAAGGATCCACGTGCTTGAG
C2	R02_#26	/5Phos/GTGCGAACTCAGACCAGAATCTATCCACGTGCTTGAG
C3	R02_#27	/5Phos/GTGCGAACTCAGACCAGACATAATCCACGTGCTTGAG
C4	R02_#28	/5Phos/GTGCGAACTCAGACCAGAGACCATCCACGTGCTTGAG
C5	R02_#29	/5Phos/GTGCGAACTCAGACCAGCCCAAATCCACGTGCTTGAG
C6	R02_#30	/5Phos/GTGCGAACTCAGACCAGCTATTATCCACGTGCTTGAG
C7	R02_#31	/5Phos/GTGCGAACTCAGACCAGGAGGTATCCACGTGCTTGAG
C8	R02_#32	/5Phos/GTGCGAACTCAGACCAGGGCTTATCCACGTGCTTGAG
C9	R02_#33	/5Phos/GTGCGAACTCAGACCAGGTGTAATCCACGTGCTTGAG
C10	R02_#34	/5Phos/GTGCGAACTCAGACCAGTGCTCATCCACGTGCTTGAG
C11	R02_#35	/5Phos/GTGCGAACTCAGACCAGTGGGAATCCACGTGCTTGAG
C12	R02_#36	/5Phos/GTGCGAACTCAGACCAGTTACGATCCACGTGCTTGAG
D1	R02_#37	/5Phos/GTGCGAACTCAGACCATAAGGGATCCACGTGCTTGAG
D2	R02_#38	/5Phos/GTGCGAACTCAGACCATCATTCATCCACGTGCTTGAG
D3	R02_#39	/5Phos/GTGCGAACTCAGACCATGGAACATCCACGTGCTTGAG
D4	R02_#40	/5Phos/GTGCGAACTCAGACCATGTGCCATCCACGTGCTTGAG
D5	R02_#41	/5Phos/GTGCGAACTCAGACCATTCACCATCCACGTGCTTGAG
D6	R02_#42	/5Phos/GTGCGAACTCAGACCATTCGAGATCCACGTGCTTGAG
D7	R02_#43	/5Phos/GTGCGAACTCAGACCCAAGCCTATCCACGTGCTTGAG
D8	R02_#44	/5Phos/GTGCGAACTCAGACCCACAAGGATCCACGTGCTTGAG
D9	R02_#45	/5Phos/GTGCGAACTCAGACCCACCTTAATCCACGTGCTTGAG
D10	R02_#46	/5Phos/GTGCGAACTCAGACCCAGAGTGATCCACGTGCTTGAG
D11	R02_#47	/5Phos/GTGCGAACTCAGACCCAGCGAAATCCACGTGCTTGAG
D12	R02_#48	/5Phos/GTGCGAACTCAGACCCAGGTCAATCCACGTGCTTGAG
E1	R02_#49	/5Phos/GTGCGAACTCAGACCCATAACTATCCACGTGCTTGAG
E2	R02_#50	/5Phos/GTGCGAACTCAGACCCATATCGATCCACGTGCTTGAG
E3	R02_#51	/5Phos/GTGCGAACTCAGACCCATCGATATCCACGTGCTTGAG
E4	R02_#52	/5Phos/GTGCGAACTCAGACCCATTACAATCCACGTGCTTGAG
E5	R02_#53	/5Phos/GTGCGAACTCAGACCCATTTCCATCCACGTGCTTGAG
E6	R02_#54	/5Phos/GTGCGAACTCAGACCCCAAATGATCCACGTGCTTGAG
E7	R02_#55	/5Phos/GTGCGAACTCAGACCCCACTTGATCCACGTGCTTGAG
E8	R02_#56	/5Phos/GTGCGAACTCAGACCCCGGATAATCCACGTGCTTGAG
E9	R02_#57	/5Phos/GTGCGAACTCAGACCCCGGTTTATCCACGTGCTTGAG
E10	R02_#58	/5Phos/GTGCGAACTCAGACCCCTAAGAATCCACGTGCTTGAG
E11	R02_#59	/5Phos/GTGCGAACTCAGACCCCTAGTCATCCACGTGCTTGAG
E12	R02_#60	/5Phos/GTGCGAACTCAGACCCCTGCAAATCCACGTGCTTGAG
F1	R02_#61	/5Phos/GTGCGAACTCAGACCCGACGTTATCCACGTGCTTGAG
F2	R02_#62	/5Phos/GTGCGAACTCAGACCCGAGTAAATCCACGTGCTTGAG
F3	R02_#63	/5Phos/GTGCGAACTCAGACCCGATTATATCCACGTGCTTGAG
F4	R02_#64	/5Phos/GTGCGAACTCAGACCCGTAGCAATCCACGTGCTTGAG
F5	R02_#65	/5Phos/GTGCGAACTCAGACCCGTCTGAATCCACGTGCTTGAG
F6	R02_#66	/5Phos/GTGCGAACTCAGACCCTACAGCATCCACGTGCTTGAG
F7	R02_#67	/5Phos/GTGCGAACTCAGACCCTCAATAATCCACGTGCTTGAG
F8	R02_#68	/5Phos/GTGCGAACTCAGACCCTCGTTGATCCACGTGCTTGAG
F9	R02_#69	/5Phos/GTGCGAACTCAGACCCTCTACGATCCACGTGCTTGAG
F10	R02_#70	/5Phos/GTGCGAACTCAGACCCTTGGGTATCCACGTGCTTGAG
F11	R02_#71	/5Phos/GTGCGAACTCAGACCGAAACTCATCCACGTGCTTGAG
F12	R02_#72	/5Phos/GTGCGAACTCAGACCGACTGTCATCCACGTGCTTGAG
G1	R02_#73	/5Phos/GTGCGAACTCAGACCGATACAGATCCACGTGCTTGAG
G2	R02_#74	/5Phos/GTGCGAACTCAGACCGCGATCAATCCACGTGCTTGAG
G3	R02_#75	/5Phos/GTGCGAACTCAGACCGCGTACTATCCACGTGCTTGAG
G4	R02_#76	/5Phos/GTGCGAACTCAGACCGCTCGAAATCCACGTGCTTGAG
G5	R02_#77	/5Phos/GTGCGAACTCAGACCGGAAGAAATCCACGTGCTTGAG
G6	R02_#78	/5Phos/GTGCGAACTCAGACCGGAGATTATCCACGTGCTTGAG
G7	R02_#79	/5Phos/GTGCGAACTCAGACCGGGCTAAATCCACGTGCTTGAG
G8	R02_#80	/5Phos/GTGCGAACTCAGACCGGGTATGATCCACGTGCTTGAG
G9	R02_#81	/5Phos/GTGCGAACTCAGACCGGTAACCATCCACGTGCTTGAG
G10	R02_#82	/5Phos/GTGCGAACTCAGACCGGTAGTGATCCACGTGCTTGAG
G11	R02_#83	/5Phos/GTGCGAACTCAGACCGGTGAAAATCCACGTGCTTGAG
G12	R02_#84	/5Phos/GTGCGAACTCAGACCGTAATCGATCCACGTGCTTGAG
H1	R02_#85	/5Phos/GTGCGAACTCAGACCGTATAAGATCCACGTGCTTGAG
H2	R02_#86	/5Phos/GTGCGAACTCAGACCGTCAGACATCCACGTGCTTGAG
H3	R02_#87	/5Phos/GTGCGAACTCAGACCGTCCCTTATCCACGTGCTTGAG
H4	R02_#88	/5Phos/GTGCGAACTCAGACCGTGCCATATCCACGTGCTTGAG
H5	R02_#89	/5Phos/GTGCGAACTCAGACCGTGGTCTATCCACGTGCTTGAG
H6	R02_#90	/5Phos/GTGCGAACTCAGACCGTTCTCCATCCACGTGCTTGAG
H7	R02_#91	/5Phos/GTGCGAACTCAGACCGTTGCTTATCCACGTGCTTGAG
H8	R02_#92	/5Phos/GTGCGAACTCAGACCTACCCGAATCCACGTGCTTGAG
H9	R02_#93	/5Phos/GTGCGAACTCAGACCTAGACGAATCCACGTGCTTGAG
H10	R02_#94	/5Phos/GTGCGAACTCAGACCTAGTCACATCCACGTGCTTGAG
H11	R02_#95	/5Phos/GTGCGAACTCAGACCTCACATCATCCACGTGCTTGAG
H12	R02_#96	/5Phos/GTGCGAACTCAGACCTCAGCTGATCCACGTGCTTGAG
BC#03 WellPosition	Name	Sequence
A1	R03_#01	/5Phos/CATCGGCGTACGACTAAACCGGGGATTCGAGGAGCGT
A2	R03_#02	/5Phos/CATCGGCGTACGACTAAACGTCGGATTCGAGGAGCGT
A3	R03_#03	/5Phos/CATCGGCGTACGACTAAAGATGGGATTCGAGGAGCGT
A4	R03_#04	/5Phos/CATCGGCGTACGACTAAATCCAGGATTCGAGGAGCGT
A5	R03_#05	/5Phos/CATCGGCGTACGACTAAATGAGGGATTCGAGGAGCGT
A6	R03_#06	/5Phos/CATCGGCGTACGACTAACACTGGGATTCGAGGAGCGT
A7	R03_#07	/5Phos/CATCGGCGTACGACTAACGTTTGGATTCGAGGAGCGT
A8	R03_#08	/5Phos/CATCGGCGTACGACTAAGAAGCGGATTCGAGGAGCGT
A9	R03_#09	/5Phos/CATCGGCGTACGACTAAGCCCTGGATTCGAGGAGCGT
A10	R03_#10	/5Phos/CATCGGCGTACGACTAAGCTACGGATTCGAGGAGCGT
A11	R03_#11	/5Phos/CATCGGCGTACGACTAATCTTGGGATTCGAGGAGCGT
A12	R03_#12	/5Phos/CATCGGCGTACGACTACAACACGGATTCGAGGAGCGT
B1	R03_#13	/5Phos/CATCGGCGTACGACTACAGTATGGATTCGAGGAGCGT
B2	R03_#14	/5Phos/CATCGGCGTACGACTACCAAGTGGATTCGAGGAGCGT
B3	R03_#15	/5Phos/CATCGGCGTACGACTACCCTAAGGATTCGAGGAGCGT
B4	R03_#16	/5Phos/CATCGGCGTACGACTACCCTTTGGATTCGAGGAGCGT
B5	R03_#17	/5Phos/CATCGGCGTACGACTACCTCTCGGATTCGAGGAGCGT
B6	R03_#18	/5Phos/CATCGGCGTACGACTACGATTGGGATTCGAGGAGCGT
B7	R03_#19	/5Phos/CATCGGCGTACGACTACGCAGAGGATTCGAGGAGCGT
B8	R03_#20	/5Phos/CATCGGCGTACGACTACGTAAAGGATTCGAGGAGCGT
B9	R03_#21	/5Phos/CATCGGCGTACGACTACTACCTGGATTCGAGGAGCGT
B10	R03_#22	/5Phos/CATCGGCGTACGACTACTCGGTGGATTCGAGGAGCGT
B11	R03_#23	/5Phos/CATCGGCGTACGACTACTGTCGGGATTCGAGGAGCGT
B12	R03_#24	/5Phos/CATCGGCGTACGACTACTTATGGGATTCGAGGAGCGT
C1	R03_#25	/5Phos/CATCGGCGTACGACTAGAAAGGGGATTCGAGGAGCGT
C2	R03_#26	/5Phos/CATCGGCGTACGACTAGAATCTGGATTCGAGGAGCGT
C3	R03_#27	/5Phos/CATCGGCGTACGACTAGACATAGGATTCGAGGAGCGT
C4	R03_#28	/5Phos/CATCGGCGTACGACTAGAGACCGGATTCGAGGAGCGT
C5	R03_#29	/5Phos/CATCGGCGTACGACTAGCCCAAGGATTCGAGGAGCGT
C6	R03_#30	/5Phos/CATCGGCGTACGACTAGCTATTGGATTCGAGGAGCGT
C7	R03_#31	/5Phos/CATCGGCGTACGACTAGGAGGTGGATTCGAGGAGCGT
C8	R03_#32	/5Phos/CATCGGCGTACGACTAGGGCTTGGATTCGAGGAGCGT
C9	R03_#33	/5Phos/CATCGGCGTACGACTAGGTGTAGGATTCGAGGAGCGT
C10	R03_#34	/5Phos/CATCGGCGTACGACTAGTGCTCGGATTCGAGGAGCGT
C11	R03_#35	/5Phos/CATCGGCGTACGACTAGTGGGAGGATTCGAGGAGCGT
C12	R03_#36	/5Phos/CATCGGCGTACGACTAGTTACGGGATTCGAGGAGCGT
D1	R03_#37	/5Phos/CATCGGCGTACGACTATAAGGGGGATTCGAGGAGCGT
D2	R03_#38	/5Phos/CATCGGCGTACGACTATCATTCGGATTCGAGGAGCGT
D3	R03_#39	/5Phos/CATCGGCGTACGACTATGGAACGGATTCGAGGAGCGT
D4	R03_#40	/5Phos/CATCGGCGTACGACTATGTGCCGGATTCGAGGAGCGT
D5	R03_#41	/5Phos/CATCGGCGTACGACTATTCACCGGATTCGAGGAGCGT
D6	R03_#42	/5Phos/CATCGGCGTACGACTATTCGAGGGATTCGAGGAGCGT
D7	R03_#43	/5Phos/CATCGGCGTACGACTCAAGCCTGGATTCGAGGAGCGT
D8	R03_#44	/5Phos/CATCGGCGTACGACTCACAAGGGGATTCGAGGAGCGT
D9	R03_#45	/5Phos/CATCGGCGTACGACTCACCTTAGGATTCGAGGAGCGT
D10	R03_#46	/5Phos/CATCGGCGTACGACTCAGAGTGGGATTCGAGGAGCGT
D11	R03_#47	/5Phos/CATCGGCGTACGACTCAGCGAAGGATTCGAGGAGCGT
D12	R03_#48	/5Phos/CATCGGCGTACGACTCAGGTCAGGATTCGAGGAGCGT
E1	R03_#49	/5Phos/CATCGGCGTACGACTCATAACTGGATTCGAGGAGCGT
E2	R03_#50	/5Phos/CATCGGCGTACGACTCATATCGGGATTCGAGGAGCGT
E3	R03_#51	/5Phos/CATCGGCGTACGACTCATCGATGGATTCGAGGAGCGT
E4	R03_#52	/5Phos/CATCGGCGTACGACTCATTACAGGATTCGAGGAGCGT
E5	R03_#53	/5Phos/CATCGGCGTACGACTCATTTCCGGATTCGAGGAGCGT
E6	R03_#54	/5Phos/CATCGGCGTACGACTCCAAATGGGATTCGAGGAGCGT
E7	R03_#55	/5Phos/CATCGGCGTACGACTCCACTTGGGATTCGAGGAGCGT
E8	R03_#56	/5Phos/CATCGGCGTACGACTCCGGATAGGATTCGAGGAGCGT
E9	R03_#57	/5Phos/CATCGGCGTACGACTCCGGTTTGGATTCGAGGAGCGT
E10	R03_#58	/5Phos/CATCGGCGTACGACTCCTAAGAGGATTCGAGGAGCGT
E11	R03_#59	/5Phos/CATCGGCGTACGACTCCTAGTCGGATTCGAGGAGCGT
E12	R03_#60	/5Phos/CATCGGCGTACGACTCCTGCAAGGATTCGAGGAGCGT
F1	R03_#61	/5Phos/CATCGGCGTACGACTCGACGTTGGATTCGAGGAGCGT
F2	R03_#62	/5Phos/CATCGGCGTACGACTCGAGTAAGGATTCGAGGAGCGT
F3	R03_#63	/5Phos/CATCGGCGTACGACTCGATTATGGATTCGAGGAGCGT
F4	R03_#64	/5Phos/CATCGGCGTACGACTCGTAGCAGGATTCGAGGAGCGT
F5	R03_#65	/5Phos/CATCGGCGTACGACTCGTCTGAGGATTCGAGGAGCGT
F6	R03_#66	/5Phos/CATCGGCGTACGACTCTACAGCGGATTCGAGGAGCGT
F7	R03_#67	/5Phos/CATCGGCGTACGACTCTCAATAGGATTCGAGGAGCGT
F8	R03_#68	/5Phos/CATCGGCGTACGACTCTCGTTGGGATTCGAGGAGCGT
F9	R03_#69	/5Phos/CATCGGCGTACGACTCTCTACGGGATTCGAGGAGCGT
F10	R03_#70	/5Phos/CATCGGCGTACGACTCTTGGGTGGATTCGAGGAGCGT
F11	R03_#71	/5Phos/CATCGGCGTACGACTGAAACTCGGATTCGAGGAGCGT
F12	R03_#72	/5Phos/CATCGGCGTACGACTGACTGTCGGATTCGAGGAGCGT
G1	R03_#73	/5Phos/CATCGGCGTACGACTGATACAGGGATTCGAGGAGCGT
G2	R03_#74	/5Phos/CATCGGCGTACGACTGCGATCAGGATTCGAGGAGCGT
G3	R03_#75	/5Phos/CATCGGCGTACGACTGCGTACTGGATTCGAGGAGCGT
G4	R03_#76	/5Phos/CATCGGCGTACGACTGCTCGAAGGATTCGAGGAGCGT
G5	R03_#77	/5Phos/CATCGGCGTACGACTGGAAGAAGGATTCGAGGAGCGT
G6	R03_#78	/5Phos/CATCGGCGTACGACTGGAGATTGGATTCGAGGAGCGT
G7	R03_#79	/5Phos/CATCGGCGTACGACTGGGCTAAGGATTCGAGGAGCGT
G8	R03_#80	/5Phos/CATCGGCGTACGACTGGGTATGGGATTCGAGGAGCGT
G9	R03_#81	/5Phos/CATCGGCGTACGACTGGTAACCGGATTCGAGGAGCGT
G10	R03_#82	/5Phos/CATCGGCGTACGACTGGTAGTGGGATTCGAGGAGCGT
G11	R03_#83	/5Phos/CATCGGCGTACGACTGGTGAAAGGATTCGAGGAGCGT
G12	R03_#84	/5Phos/CATCGGCGTACGACTGTAATCGGGATTCGAGGAGCGT
H1	R03_#85	/5Phos/CATCGGCGTACGACTGTATAAGGGATTCGAGGAGCGT
H2	R03_#86	/5Phos/CATCGGCGTACGACTGTCAGACGGATTCGAGGAGCGT
H3	R03_#87	/5Phos/CATCGGCGTACGACTGTCCCTTGGATTCGAGGAGCGT
H4	R03_#88	/5Phos/CATCGGCGTACGACTGTGCCATGGATTCGAGGAGCGT
H5	R03_#89	/5Phos/CATCGGCGTACGACTGTGGTCTGGATTCGAGGAGCGT
H6	R03_#90	/5Phos/CATCGGCGTACGACTGTTCTCCGGATTCGAGGAGCGT
H7	R03_#91	/5Phos/CATCGGCGTACGACTGTTGCTTGGATTCGAGGAGCGT
H8	R03_#92	/5Phos/CATCGGCGTACGACTTACCCGAGGATTCGAGGAGCGT
H9	R03_#93	/5Phos/CATCGGCGTACGACTTAGACGAGGATTCGAGGAGCGT
H10	R03_#94	/5Phos/CATCGGCGTACGACTTAGTCACGGATTCGAGGAGCGT
H11	R03_#95	/5Phos/CATCGGCGTACGACTTCACATCGGATTCGAGGAGCGT
H12	R03_#96	/5Phos/CATCGGCGTACGACTTCAGCTGGGATTCGAGGAGCGT
BC#04 WellPosition	Name	Sequence
A1	R04_#01	CAGACGTGTGCTCTTCCGATCTNNNNNNNNNNAAACCGGGTGGCCGATGTTTCG
A2	R04_#02	CAGACGTGTGCTCTTCCGATCTNNNNNNNNNNAAACGTCGTGGCCGATGTTTCG
A3	R04_#03	CAGACGTGTGCTCTTCCGATCTNNNNNNNNNNAAAGATGGTGGCCGATGTTTCG
A4	R04_#04	CAGACGTGTGCTCTTCCGATCTNNNNNNNNNNAAATCCANGTGGCCGATGTTTCG
A5	R04_#05	CAGACGTGTGCTCTTCCGATCTNNNNNNNNNNAAATGAGNGTGGCCGATGTTTCG
A6	R04_#06	CAGACGTGTGCTCTTCCGATCTNNNNNNNNNNAACACTGNGTGGCCGATGTTTCG
A7	R04_#07	CAGACGTGTGCTCTTCCGATCTNNNNNNNNNNAACGTTTNNGTGGCCGATGTTTCG
A8	R04_#08	CAGACGTGTGCTCTTCCGATCTNNNNNNNNNNAAGAAGCNNGTGGCCGATGTTTCG
A9	R04_#09	CAGACGTGTGCTCTTCCGATCTNNNNNNNNNNAAGCCCTNNGTGGCCGATGTTTCG
A10	R04_#10	CAGACGTGTGCTCTTCCGATCTNNNNNNNNNNAAGCTACNNNGTGGCCGATGTTTCG
A11	R04_#11	CAGACGTGTGCTCTTCCGATCTNNNNNNNNNNAATCTTGNNNGTGGCCGATGTTTCG
A12	R04_#12	CAGACGTGTGCTCTTCCGATCTNNNNNNNNNNACAACACNNNGTGGCCGATGTTTCG
B1	R04_#13	CAGACGTGTGCTCTTCCGATCTNNNNNNNNNNACAGTATGTGGCCGATGTTTCG
B2	R04_#14	CAGACGTGTGCTCTTCCGATCTNNNNNNNNNNACCAAGTGTGGCCGATGTTTCG
B3	R04_#15	CAGACGTGTGCTCTTCCGATCTNNNNNNNNNNACCCTAAGTGGCCGATGTTTCG
B4	R04_#16	CAGACGTGTGCTCTTCCGATCTNNNNNNNNNNACCCTTTNGTGGCCGATGTTTCG
B5	R04_#17	CAGACGTGTGCTCTTCCGATCTNNNNNNNNNNACCTCTCNGTGGCCGATGTTTCG
B6	R04_#18	CAGACGTGTGCTCTTCCGATCTNNNNNNNNNNACGATTGNGTGGCCGATGTTTCG
B7	R04_#19	CAGACGTGTGCTCTTCCGATCTNNNNNNNNNNACGCAGANNGTGGCCGATGTTTCG
B8	R04_#20	CAGACGTGTGCTCTTCCGATCTNNNNNNNNNNACGTAAANNGTGGCCGATGTTTCG
B9	R04_#21	CAGACGTGTGCTCTTCCGATCTNNNNNNNNNNACTACCTNNGTGGCCGATGTTTCG
B10	R04_#22	CAGACGTGTGCTCTTCCGATCTNNNNNNNNNNACTCGGTNNNGTGGCCGATGTTTCG
B11	R04_#23	CAGACGTGTGCTCTTCCGATCTNNNNNNNNNNACTGTCGNNNGTGGCCGATGTTTCG
B12	R04_#24	CAGACGTGTGCTCTTCCGATCTNNNNNNNNNNACTTATGNNNGTGGCCGATGTTTCG
C1	R04_#25	CAGACGTGTGCTCTTCCGATCTNNNNNNNNNNAGAAAGGGTGGCCGATGTTTCG
C2	R04_#26	CAGACGTGTGCTCTTCCGATCTNNNNNNNNNNAGAATCTGTGGCCGATGTTTCG
C3	R04_#27	CAGACGTGTGCTCTTCCGATCTNNNNNNNNNNAGACATAGTGGCCGATGTTTCG
C4	R04_#28	CAGACGTGTGCTCTTCCGATCTNNNNNNNNNNAGAGACCNGTGGCCGATGTTTCG
C5	R04_#29	CAGACGTGTGCTCTTCCGATCTNNNNNNNNNNAGCCCAANGTGGCCGATGTTTCG
C6	R04_#30	CAGACGTGTGCTCTTCCGATCTNNNNNNNNNNAGCTATTNGTGGCCGATGTTTCG
C7	R04_#31	CAGACGTGTGCTCTTCCGATCTNNNNNNNNNNAGGAGGTNNGTGGCCGATGTTTCG
C8	R04_#32	CAGACGTGTGCTCTTCCGATCTNNNNNNNNNNAGGGCTTNNGTGGCCGATGTTTCG
C9	R04_#33	CAGACGTGTGCTCTTCCGATCTNNNNNNNNNNAGGTGTANNGTGGCCGATGTTTCG
C10	R04_#34	CAGACGTGTGCTCTTCCGATCTNNNNNNNNNNAGTGCTCNNNGTGGCCGATGTTTCG
C11	R04_#35	CAGACGTGTGCTCTTCCGATCTNNNNNNNNNNAGTGGGANNNGTGGCCGATGTTTCG
C12	R04_#36	CAGACGTGTGCTCTTCCGATCTNNNNNNNNNNAGTTACGNNNGTGGCCGATGTTTCG
D1	R04_#37	CAGACGTGTGCTCTTCCGATCTNNNNNNNNNNATAAGGGGTGGCCGATGTTTCG
D2	R04_#38	CAGACGTGTGCTCTTCCGATCTNNNNNNNNNNATCATTCGTGGCCGATGTTTCG
D3	R04_#39	CAGACGTGTGCTCTTCCGATCTNNNNNNNNNNATGGAACGTGGCCGATGTTTCG
D4	R04_#40	CAGACGTGTGCTCTTCCGATCTNNNNNNNNNNATGTGCCNGTGGCCGATGTTTCG
D5	R04_#41	CAGACGTGTGCTCTTCCGATCTNNNNNNNNNNATTCACCNGTGGCCGATGTTTCG
D6	R04_#42	CAGACGTGTGCTCTTCCGATCTNNNNNNNNNNATTCGAGNGTGGCCGATGTTTCG
D7	R04_#43	CAGACGTGTGCTCTTCCGATCTNNNNNNNNNNCAAGCCTNNGTGGCCGATGTTTCG
D8	R04_#44	CAGACGTGTGCTCTTCCGATCTNNNNNNNNNNCACAAGGNNGTGGCCGATGTTTCG
D9	R04_#45	CAGACGTGTGCTCTTCCGATCTNNNNNNNNNNCACCTTANNGTGGCCGATGTTTCG
D10	R04_#46	CAGACGTGTGCTCTTCCGATCTNNNNNNNNNNCAGAGTGNNNGTGGCCGATGTTTCG
D11	R04_#47	CAGACGTGTGCTCTTCCGATCTNNNNNNNNNNCAGCGAANNNGTGGCCGATGTTTCG
D12	R04_#48	CAGACGTGTGCTCTTCCGATCTNNNNNNNNNNCAGGTCANNNGTGGCCGATGTTTCG
E1	R04_#49	CAGACGTGTGCTCTTCCGATCTNNNNNNNNNNCATAACTGTGGCCGATGTTTCG
E2	R04_#50	CAGACGTGTGCTCTTCCGATCTNNNNNNNNNNCATATCGGTGGCCGATGTTTCG
E3	R04_#51	CAGACGTGTGCTCTTCCGATCTNNNNNNNNNNCATCGATGTGGCCGATGTTTCG
E4	R04_#52	CAGACGTGTGCTCTTCCGATCTNNNNNNNNNNCATTACANGTGGCCGATGTTTCG
E5	R04_#53	CAGACGTGTGCTCTTCCGATCTNNNNNNNNNNCATTTCCNGTGGCCGATGTTTCG
E6	R04_#54	CAGACGTGTGCTCTTCCGATCTNNNNNNNNNNCCAAATGNGTGGCCGATGTTTCG
E7	R04_#55	CAGACGTGTGCTCTTCCGATCTNNNNNNNNNNCCACTTGNNGTGGCCGATGTTTCG
E8	R04_#56	CAGACGTGTGCTCTTCCGATCTNNNNNNNNNNCCGGATANNGTGGCCGATGTTTCG
E9	R04_#57	CAGACGTGTGCTCTTCCGATCTNNNNNNNNNNCCGGTTTNNGTGGCCGATGTTTCG
E10	R04_#58	CAGACGTGTGCTCTTCCGATCTNNNNNNNNNNCCTAAGANNNGTGGCCGATGTTTCG
E11	R04_#59	CAGACGTGTGCTCTTCCGATCTNNNNNNNNNNCCTAGTCNNNGTGGCCGATGTTTCG
E12	R04_#60	CAGACGTGTGCTCTTCCGATCTNNNNNNNNNNCCTGCAANNNGTGGCCGATGTTTCG
F1	R04_#61	CAGACGTGTGCTCTTCCGATCTNNNNNNNNNNCGACGTTGTGGCCGATGTTTCG
F2	R04_#62	CAGACGTGTGCTCTTCCGATCTNNNNNNNNNNCGAGTAAGTGGCCGATGTTTCG
F3	R04_#63	CAGACGTGTGCTCTTCCGATCTNNNNNNNNNNCGATTATGTGGCCGATGTTTCG
F4	R04_#64	CAGACGTGTGCTCTTCCGATCTNNNNNNNNNNCGTAGCANGTGGCCGATGTTTCG
F5	R04_#65	CAGACGTGTGCTCTTCCGATCTNNNNNNNNNNCGTCTGANGTGGCCGATGTTTCG
F6	R04_#66	CAGACGTGTGCTCTTCCGATCTNNNNNNNNNNCTACAGCNGTGGCCGATGTTTCG
F7	R04_#67	CAGACGTGTGCTCTTCCGATCTNNNNNNNNNNCTCAATANNGTGGCCGATGTTTCG
F8	R04_#68	CAGACGTGTGCTCTTCCGATCTNNNNNNNNNNCTCGTTGNNGTGGCCGATGTTTCG
F9	R04_#69	CAGACGTGTGCTCTTCCGATCTNNNNNNNNNNCTCTACGNNGTGGCCGATGTTTCG
F10	R04_#70	CAGACGTGTGCTCTTCCGATCTNNNNNNNNNNCTTGGGTNNNGTGGCCGATGTTTCG
F11	R04_#71	CAGACGTGTGCTCTTCCGATCTNNNNNNNNNNGAAACTCNNNGTGGCCGATGTTTCG
F12	R04_#72	CAGACGTGTGCTCTTCCGATCTNNNNNNNNNNGACTGTCNNNGTGGCCGATGTTTCG
G1	R04_#73	CAGACGTGTGCTCTTCCGATCTNNNNNNNNNNGATACAGGTGGCCGATGTTTCG
G2	R04_#74	CAGACGTGTGCTCTTCCGATCTNNNNNNNNNNGCGATCAGTGGCCGATGTTTCG
G3	R04_#75	CAGACGTGTGCTCTTCCGATCTNNNNNNNNNNGCGTACTGTGGCCGATGTTTCG
G4	R04_#76	CAGACGTGTGCTCTTCCGATCTNNNNNNNNNNGCTCGAANGTGGCCGATGTTTCG
G5	R04_#77	CAGACGTGTGCTCTTCCGATCTNNNNNNNNNNGGAAGAANGTGGCCGATGTTTCG
G6	R04_#78	CAGACGTGTGCTCTTCCGATCTNNNNNNNNNNGGAGATTNGTGGCCGATGTTTCG
G7	R04_#79	CAGACGTGTGCTCTTCCGATCTNNNNNNNNNNGGGCTAANNGTGGCCGATGTTTCG
G8	R04_#80	CAGACGTGTGCTCTTCCGATCTNNNNNNNNNNGGGTATGNNGTGGCCGATGTTTCG
G9	R04_#81	CAGACGTGTGCTCTTCCGATCTNNNNNNNNNNGGTAACCNNGTGGCCGATGTTTCG
G10	R04_#82	CAGACGTGTGCTCTTCCGATCTNNNNNNNNNNGGTAGTGNNNGTGGCCGATGTTTCG
G11	R04_#83	CAGACGTGTGCTCTTCCGATCTNNNNNNNNNNGGTGAAANNNGTGGCCGATGTTTCG
G12	R04_#84	CAGACGTGTGCTCTTCCGATCTNNNNNNNNNNGTAATCGNNNGTGGCCGATGTTTCG
H1	R04_#85	CAGACGTGTGCTCTTCCGATCTNNNNNNNNNNGTATAAGGTGGCCGATGTTTCG
H2	R04_#86	CAGACGTGTGCTCTTCCGATCTNNNNNNNNNNGTCAGACGTGGCCGATGTTTCG
H3	R04_#87	CAGACGTGTGCTCTTCCGATCTNNNNNNNNNNGTCCCTTGTGGCCGATGTTTCG
H4	R04_#88	CAGACGTGTGCTCTTCCGATCTNNNNNNNNNNGTGCCATNGTGGCCGATGTTTCG
H5	R04_#89	CAGACGTGTGCTCTTCCGATCTNNNNNNNNNNGTGGTCTNGTGGCCGATGTTTCG
H6	R04_#90	CAGACGTGTGCTCTTCCGATCTNNNNNNNNNNGTTCTCCNGTGGCCGATGTTTCG
H7	R04_#91	CAGACGTGTGCTCTTCCGATCTNNNNNNNNNNGTTGCTTNNGTGGCCGATGTTTCG
H8	R04_#92	CAGACGTGTGCTCTTCCGATCTNNNNNNNNNNTACCCGANNGTGGCCGATGTTTCG
H9	R04_#93	CAGACGTGTGCTCTTCCGATCTNNNNNNNNNNTAGACGANNGTGGCCGATGTTTCG
H10	R04_#94	CAGACGTGTGCTCTTCCGATCTNNNNNNNNNNTAGTCACNNNGTGGCCGATGTTTCG
H11	R04_#95	CAGACGTGTGCTCTTCCGATCTNNNNNNNNNNTCACATCNNNGTGGCCGATGTTTCG
H12	R04_#96	CAGACGTGTGCTCTTCCGATCTNNNNNNNNNNTCAGCTGNNNGTGGCCGATGTTTCG
